# Supplementary material for: Cancer-associated fibroblasts in gastric cancer affect malignant progression via the CXCL12-CXCR4 axis
Source: PubMed Central journal article supplement (PMC8040897; doi:10.7150/jca.49707), 2021-03-19
Supplement: jcav12p3011s1.pdf [file jcav12p3011s1.pdf]

# supplementary figures

Figure S1

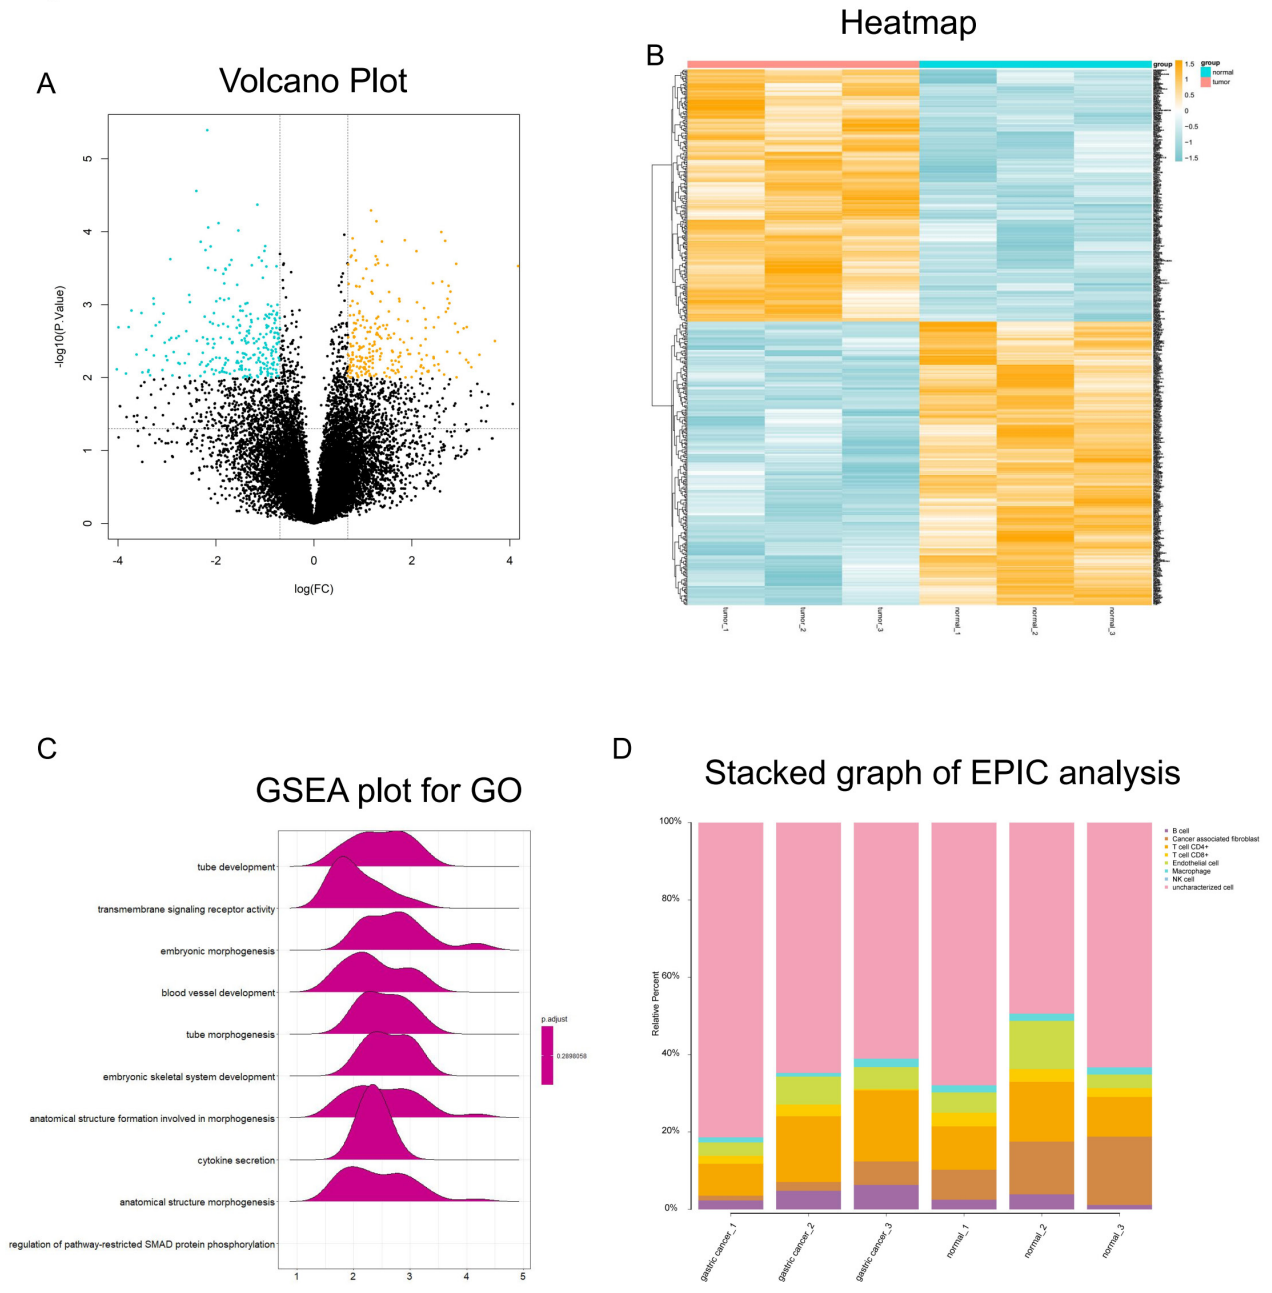

Figure S2

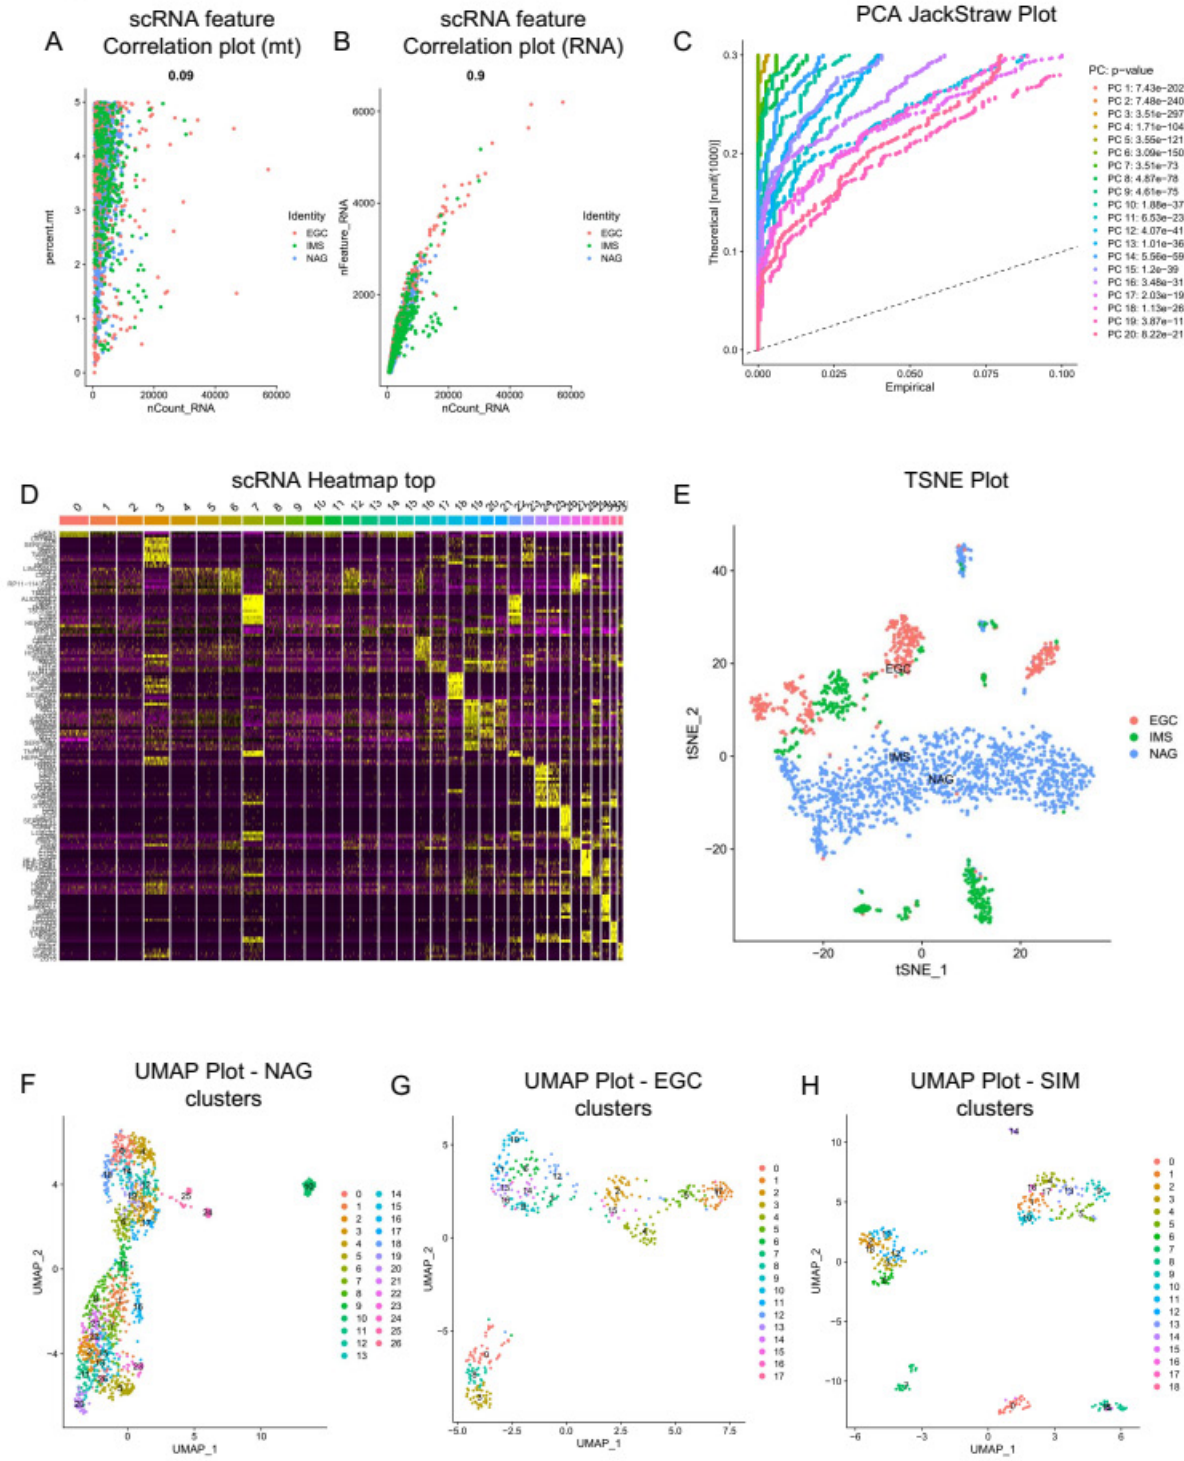

Figure S3

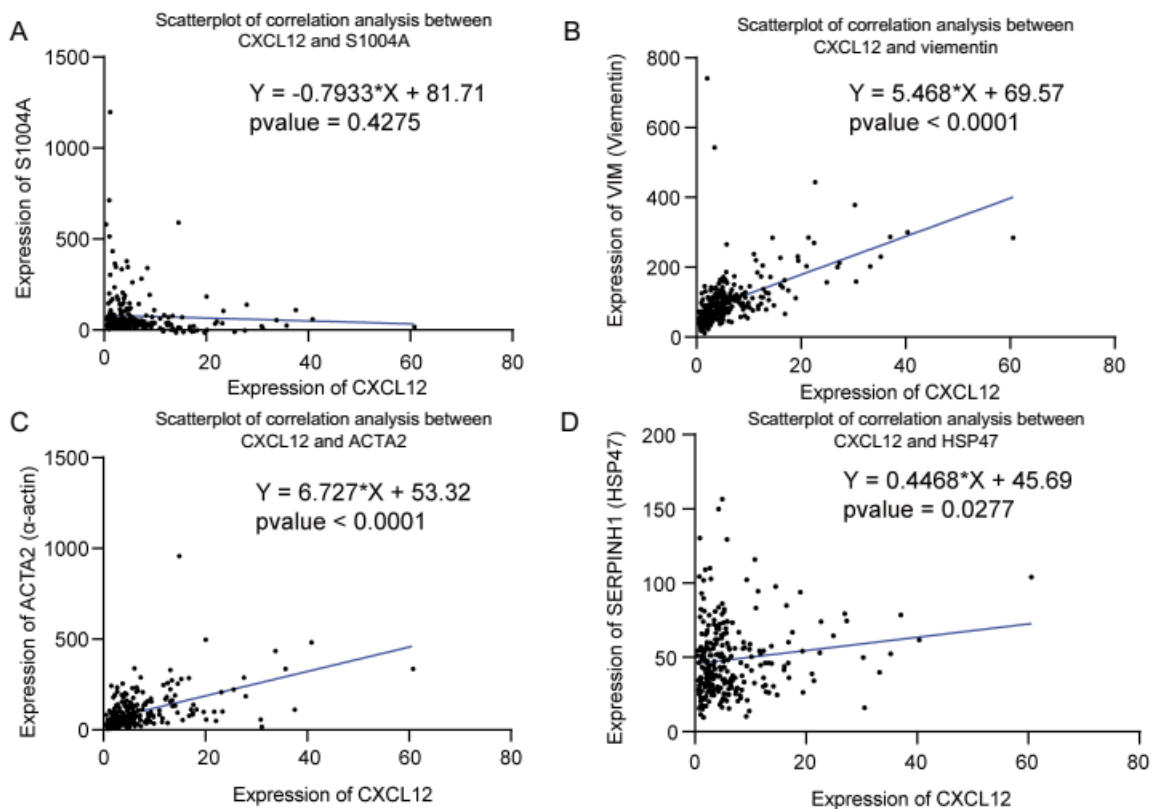

supplementary tables

Supplementary Table.1 Youden test of CXCL12<sup>CAF</sup>

| score | Sensitivity | 1-specificity | Yoden index |
|-------|-------------|---------------|-------------|
| 2.5   | 0.532       | 0.36          | 0.172       |
| 5     | 0.266       | 0.099         | 0.167       |
| 1.5   | 0.718       | 0.553         | 0.165       |
| 3.5   | 0.371       | 0.267         | 0.104       |
| 7     | 0.113       | 0.043         | 0.07        |
| 0.5   | 0.815       | 0.752         | 0.063       |
| 8.5   | 0.073       | 0.012         | 0.061       |
| 10.5  | 0.016       | 0.012         | 0.004       |
| -1    | 1           | 1             | 0           |
| 13    | 0           | 0             | 0           |

Supplementary Table.2 Youden test of Wnt5a

| score | Sensitivity | 1-specificity | Yoden index |
|-------|-------------|---------------|-------------|
| 2.5   | 0.532       | 0.36          | 0.172       |
| 3.5   | 0.427       | 0.273         | 0.154       |
| 1.5   | 0.637       | 0.571         | 0.066       |
| 5     | 0.21        | 0.161         | 0.049       |
| 0.5   | 0.653       | 0.627         | 0.026       |
| 8.5   | 0.056       | 0.043         | 0.013       |
| 7     | 0.073       | 0.062         | 0.011       |
| 10.5  | 0.024       | 0.019         | 0.005       |
| -1    | 1           | 1             | 0           |
| 13    | 0           | 0             | 0           |

Supplementary Table.3 Logostics of CXCL12CAF, Primary tumor category, and Lauren type for 5-year survival rate of patients with gastric cancer.

| Clinical parameters                       | Logistics analysis |                 | P value |
|-------------------------------------------|--------------------|-----------------|---------|
|                                           | $\beta$            | OR(95%CI)       |         |
|                                           | -0.268             |                 | 0.382   |
| Histological grade (poor vs. Well to mod) | -1.459             | 0.23(0.14-0.39) | <0.001  |
| Lauren type (Diffuse/Mixvs.Intestinal )   | 1.100              | 3.01(1.67-5.43) | <0.001  |
| CXCL12 <sup>CAF</sup> (positive/negative) | 0.848              | 2.33(1.38-3.94) | 0.002   |
